# Supplementary material for: Colibactin biosynthesis and biological activity depend on the rare aminomalonyl polyketide precursor
Source: Royal Society of Chemistry journal article supplement (doi:10.1039/c5cc02718g), 2015-01-01
Supplement: c5cc02718g1.pdf [file c5cc02718g1.pdf]

Electronic Supporting Information (ESI)

## Colibactin biosynthesis and biological activity depends on the rare aminomalonyl polyketide precursor

A. O. Brachmann, C. Garcie, V. Wu, P. Martin, R. Ueoka, E. Oswald and J. Piel

### 1. Experimental methods

#### 1.1. Fermentation

*Escherichia coli* DH5 $\alpha$ , *E. coli* Arctic Express™ (DE3) and *E. coli* MG1655 were grown in Luria-Bertani (LB) broth or on LB Agar supplemented with kanamycin at 50  $\mu\text{g mL}^{-1}$  or chloramphenicol at 37  $\mu\text{g mL}^{-1}$  where appropriate. *E. coli* DH5 $\alpha$  was routinely grown at 30 °C and 37 °C and *E. coli* MG1655 at 37 °C.

#### 1.2. Verification of DNA integrity between *clbG* and *clbH*

The revision of ClbH A1 integrity was conducted by downstream and upstream sequencing of the *clbH* A1 domain. PCR products were generated by using DNA of pBAC $pks^+$  and oligonucleotides ColGap\_Fw and ColGap\_Rv for the upstream part of *clbH* A1 and oligonucleotides ColGap2\_Fw and ColGap2\_Rv for the downstream part of *clbH* A1. PCR products were cloned into sequencing vector pJET1.2 using Thermo CloneJet PCR cloning kit. Sequencing results were analyzed and interpreted with Geneious® 7 software.

#### 1.3. Construction of expression plasmids for N-terminal His-tagged proteins

The DNA of pBAC $pks^+$  (Table S3) was used as template to PCR amplify *clbA*, *clbD*, *clbE*, *clbF*, *clbH-A1*, *clbH-A2* using Phusion DNA Polymerase (see Table S4 for primer sequences). The PCR products were ligated into the expression vector pCOLADuet™-1 (Novagen®) with the help of the Gibson Assembly® cloning kit (New England BioLabs®). For this purpose, pCOLADuet™-1 was linearized with *Bam*HI and both forward and reverse primers (Table S4) for the specific *clb* products were 5'-modified with an overlapping sequence complementary to the generated 5' and 3'-ends of the vector. ClbH-A2, ClbJ-A1 and ClbK-A2 were first cloned and expressed including the peptidyl carrier protein (PCP). Due to insufficient protein activity, ClbH-A2, ClbJ-A1 and ClbK-A2 were also expressed without PCP. For this, expression vectors ClbH-A2(PCP), ClbJ-A1(PCP) and ClbK-A2(PCP) were used as template to PCR amplify with primers Awo\_PCP\_Fw, A4wo\_PCP\_Rv and A6wo\_PCP the expression plasmids excluding PCP domains. PCR products were ligated and transformed into *E. coli* DH5 $\alpha$  by electroporation, and DNA integrity was verified by sequencing prior to transformation into the expression strain *E. coli* Arctic Express™.

#### 1.4. Construction of colibactin mutants and complementation

Gene inactivations of *clbE* and *clbDEF* were engineered by using the lambda Red recombinase method.<sup>1</sup> Briefly, PCR products were generated that were homologous to regions adjacent to the gene to be inactivated and template plasmids carrying antibiotic resistance genes flanked by FLP recognition target sites. PCRs were conducted by using primers CG\_*clbE*\_P1/CG\_*clbE*\_P2 and CG\_*clbDEF*\_P1/CG\_*clbDEF*\_P2 (Table S4). Deletion mutants of the *clbE* gene or the *clbDEF* operon were isolated as antibiotic-resistant colonies after the introduction of synthetic PCR-generated DNA into bacteria carrying the lambda Red expression pKD46 plasmid. The resistance genes were then eliminated by using the pCP20 helper plasmid encoding the FLP recombinase. For complementation of the

$\Delta clbE$  mutant, the pCOLAclbE plasmid (described in 1.3, Table S3) was transformed into the MG1655 pBACpks<sup>+</sup>  $\Delta clbE$  strain. For complementation of the  $\Delta clbDEF$  mutant, the DNA of pBACpks<sup>+</sup> (Table S3) was used as template to PCR amplify the *clbDEF* operon using Phusion DNA Polymerase and primers CG\_clbDEF\_Fw/CG\_clbDEF\_Rv (Table S4). The PCR product was ligated into pCR-XL-TOPO vector using the TOPO<sup>®</sup> XL PCR Cloning Kit (Invitrogen). The generated pTOPOclbDEF plasmid (Table S3) was then transformed into the MG1655 pBACpks<sup>+</sup>  $\Delta clbDEF$  strain.

### 1.5. Overexpression and purification of His-tagged Clb enzymes

Large scale 1 L cultures of Luria Bertani broth supplemented with 50  $\mu\text{g ml}^{-1}$  kanamycin were inoculated 1:400 with an overnight culture of the respective expression strain. Cultures were incubated at 30 °C at 200 rpm. As soon as the cultures reached an  $\text{OD}_{600} = 0.6-0.8$  they were chilled on ice for 1 h and subsequently induced with 0.1 mM IPTG. Afterwards cultures were incubated at 16 °C for additional 20 h. The cells were harvested by centrifugation at 3000 $\times$ g, 4 °C for 20 min and the cell pellet was quick-frozen with liquid nitrogen. The cell pellet was resuspended in 4 mL lysis buffer (50 mM sodium phosphate buffer pH 8, 300 mM NaCl, 10 % glycerol, 20 mM imidazole) per gram cell pellet and lysozyme (1 mg mL<sup>-1</sup>) was added. The suspension was allowed to stir at 4 °C for 1 h prior to sonification. The cell lysate was centrifuged at 18,000 $\times$ g for 45 min. The supernatant was transferred into a fresh tube, mixed with Ni-NTA resin (approx.1 mg) and rocked at 4 °C for 1 h, followed by centrifugation at 800 g, 4 °C for 10 min. The supernatant was discarded and the resin was washed twice with lysis buffer and finally transferred to a column with frit. A stepwise imidazole gradient using thrice the bed volume for each step (40 mM, 60 mM, 80 mM and 250 mM) was deployed to elute the protein. The presence and purity of the proteins were monitored by SDS-PAGE analysis. Fractions with the respective proteins were dialyzed thrice against 1 L storage buffer (20 mM Tris-HCl pH 7.5, 10 % glycerol, 1 mM DTT).

### 1.6. Enzyme Assays

For enzyme reactions the following stock solutions were prepared: 1 M Tris-HCl pH 8.5, 200 mM MgCl<sub>2</sub>, 100 mM coenzymeA (Sigma-Aldrich GmbH), 1 M DTT, 200 mM L-serine, 200 mM L-serine-<sup>13</sup>C<sub>3</sub> (Sigma-Aldrich GmbH), 100 mM ATP (Sigma-Aldrich GmbH), 20 mM NAD<sup>+</sup> (Sigma-Aldrich GmbH), 10 mM FAD (Sigma-Aldrich GmbH). The concentrations of the used enzyme stocks are mentioned in the section before.

(1) The ACP/PPTase assay (100  $\mu\text{l}$ ) contained reaction buffer (100 mM Tris-HCl pH 8.5, 20 mM MgCl<sub>2</sub>, 1 mM coenzyme A, 10 mM DTT), 10  $\mu\text{l}$  ACP (ClbE), 2 $\mu\text{l}$  PPTase (ClbA) The volume was adjusted with H<sub>2</sub>O to 100  $\mu\text{L}$  and the assay was incubated at 30 °C for 1 h. A control experiment contained 2  $\mu\text{L}$  water instead of PPTase (ClbA). All enzyme reactions were quenched by adding 100  $\mu\text{l}$  (80 % acetonitrile + 0.1 % TFA) and analyzed by HESI-MS.

(2) The ACP loading assay contained in addition to assay (1) 3 mM ATP, 2 mM L-serine and 5  $\mu\text{l}$  adenylation domain ClbA(A) and was incubated at 30 °C for 30, 60 and 120 min. Control reactions were conducted replacing the adenylation domain ClbA(A), L-serine and both with H<sub>2</sub>O.

(3) The seryl-ACP assay contained in addition to assay (2) 2 mM NAD<sup>+</sup> in the presence of ClbD and 1 mM FAD in the presence of ClbF. The reactions were incubated at 30 °C for 2 h. Controls were conducted with boiled (98 °C for 5 min) ClbD and ClbF and H<sub>2</sub>O instead of ClbD and ClbF.

(4) The characterization of adenylation domains was achieved by using the  $\gamma$ -[<sup>18</sup>O<sub>4</sub>]-ATP pyrophosphate exchange assay as described before.<sup>2</sup> Briefly, reaction mixtures each with a total volume of 6  $\mu$ l consisted of 2  $\mu$ M enzyme ClbH-A1, 1 mM amino acid, 0.3 mM DTT, 5 mM MgCl<sub>2</sub>, 5 mM inorganic pyrophosphate, 1 mM  $\gamma$ -<sup>18</sup>O<sub>4</sub> ATP and 20 mM Tris-HCl (pH 7.5). All canonical amino acids and three available non-canonical amino acids, ethylglycine (EtGly), 2,3-diaminopropionic acid (DAP), norvaline, were tested. ClbH-A1 and ClbH-A2 were also tested with 1-aminocyclopropanecarboxylic acid (ACC) (Sigma-Aldrich) and S-(5'-adenosyl)-L-methionine (SAM) (Sigma-Aldrich). The reaction was incubated at RT for 2 h, quenched with 6  $\mu$ l MALDI matrix 9-aminoacridine in acetone (10 mg mL<sup>-1</sup>) and analyzed using a MALDI LTQ Orbitrap instrument (Thermo Scientific).

### 1.7. MS analysis of ACP derivatives

ACP-assay samples were subjected to ultra-performance liquid chromatography-high resolution heated electrospray ionization mass spectrometry (UPLC HR HESI-MS) analysis. Data were collected on a Thermo Scientific™ Q Exactive™ Hybrid Quadrupole-Orbitrap Mass Spectrometer coupled to a Dionex Ultimate 3000 UPLC system. Obtained series of multiply charged ions were transformed into single molecular masses with the help of Thermo Protein Deconvolution 2.0 SP1 software. The following solvent gradient (A = H<sub>2</sub>O + 0.1% formic acid, B = acetonitrile + 0.1% formic acid with B at 10% for 0-2.5 min, 10-100% for 2.5-8 min and 100% for 8-10 min at a flowrate of 0.5 ml min<sup>-1</sup>) was used on a Phenomenex Aeris Widepore C4 3.6  $\mu$ m C4 (50 X 2.1 mm) column at 50 °C. The MS was operated in positive ionization mode at a scan range of 333.4 -2000 *m/z* and a resolution of 140,000. The spray voltage was set to 3.5 kV, the S-lens to 100, the auxiliary gas heater temperature to 400 °C and the capillary temperature to 275 °C.

### 1.8. MALDI MS analysis of [<sup>18</sup>O<sub>4</sub>]-ATP pyrophosphate exchange assay products

The data were recorded on a Thermo Scientific™ MALDI LTQ Orbitrap™ XL equipped with a nitrogen laser at  $\lambda$ = 337 nm. The MS was operated in negative ionization and FTMS mode. The laser energy was tuned semiautomatically on 9-aminoacridine (10 mg ml<sup>-1</sup> in acetone) matrix and set to 40  $\mu$ J. The following parameters were applied: automatic spectrum filtering (ASF) = off, automatic gain control (AGC) = on, number of laser shots = 1, microscans = 1, resolution 15000, scan range from 500-520 *m/z* and crystal positioning system (CPS). The average of 200 scans was used for each amino acid analysis. Data were normalized to the highest exchange rate for ClbJ-A1, ClbK-A2 and ClbH-A1.

### 1.9. HPLC-MS analysis of crude extracts of *clbE*, *clbDEF*, and complemented deletion mutants

20 mL cultures of Luria Bertani broth containing XAD-16 resin (Sigma-Aldrich) were inoculated 1:100 with an overnight culture of the respective strain (*E. coli* MG 1655 pks<sup>+</sup>  $\Delta$ *clbE*, *E. coli* MG 1655 pks<sup>+</sup>  $\Delta$ *clbDEF*, *E. coli* MG 1655 pks<sup>+</sup>  $\Delta$ *clbE* pTOPO*clbE*, *E. coli* MG 1655 pks<sup>+</sup>  $\Delta$ *clbDEF* pTOPO*clbDEF*) and grown for 24 h at 37 °C. XAD-16 was harvested and washed with deionized water and extracted with 20 mL methanol. The extract was filtered, dried and redissolved in 1 mL methanol. 1:4 diluted samples were used for HPLC-MS analysis. Samples were analyzed by ultra-performance liquid chromatography-high resolution heated electrospray ionization mass

spectrometry (UPLC HR HESI-MS). Data were collected on a Thermo Scientific™ Q Exactive™ Hybrid Quadrupole-Orbitrap Mass Spectrometer coupled to a Dionex Ultimate 3000 UPLC system. The following solvent gradient (A = H<sub>2</sub>O + 0.1% formic acid, B = acetonitrile + 0.1% formic acid with B at 5% for 0-2 min, 5%-98% for 2-25 min and 98% for 25-29.5 min at a flowrate of 0.5 ml min<sup>-1</sup>) was used on a Phenomenex Kinetex XB-C18 2.6 μm 100 Å (150 X 4.6 mm) column at 30 °C. The MS was operated in positive ionization mode at a scan range of 250-2000 *m/z* and a resolution of 70,000. The spray voltage was set to 3.5 kV, the S-lens to 50, the auxiliary gas heater temperature to 430 °C and the capillary temperature to 270 °C.

#### **1.10. Megalocytosis and genotoxicity assay**

The megalocytosis effect induced by colibactin was determined as previously described.<sup>3</sup> Briefly, HeLa cells were dispensed in 96-well cell culture plate (5×10<sup>3</sup> cells/well) and incubated for 24 hours. For bacterial infections, overnight LB broth cultures of *E. coli* were diluted in interaction medium (DMEM, 5% FCS, 25mM HEPES) and cell cultures were infected with a multiplicity of infection (number of bacteria per HeLa cell at the onset of infection) of 6 to 200. Four hours post-inoculation, cells were washed 3 times with HBSS and incubated in cell culture medium with 200 μg/mL gentamicin until analysis. For megalocytosis quantification, cells were incubated for 72 h before protein staining with methylene blue (1% w/v in Tris-HCl 0.01M). The methylene blue was extracted with HCl 0.1 N. The quantification of staining was measured at OD<sub>660</sub>.

#### **1.11. Statistical analysis**

Statistical analyses were conducted using GraphPad Prism 6.0c. The mean ± standard deviation (SD) is shown in figures, and p-values were calculated using a one-way ANOVA followed by a Bonferroni post-test unless otherwise stated. A p-value of less than 0.05 was considered statistically significant and is denoted by \*. p < 0.01 is denoted by \*\* and p < 0.001 by \*\*\*. Non-significant result is denoted ns.

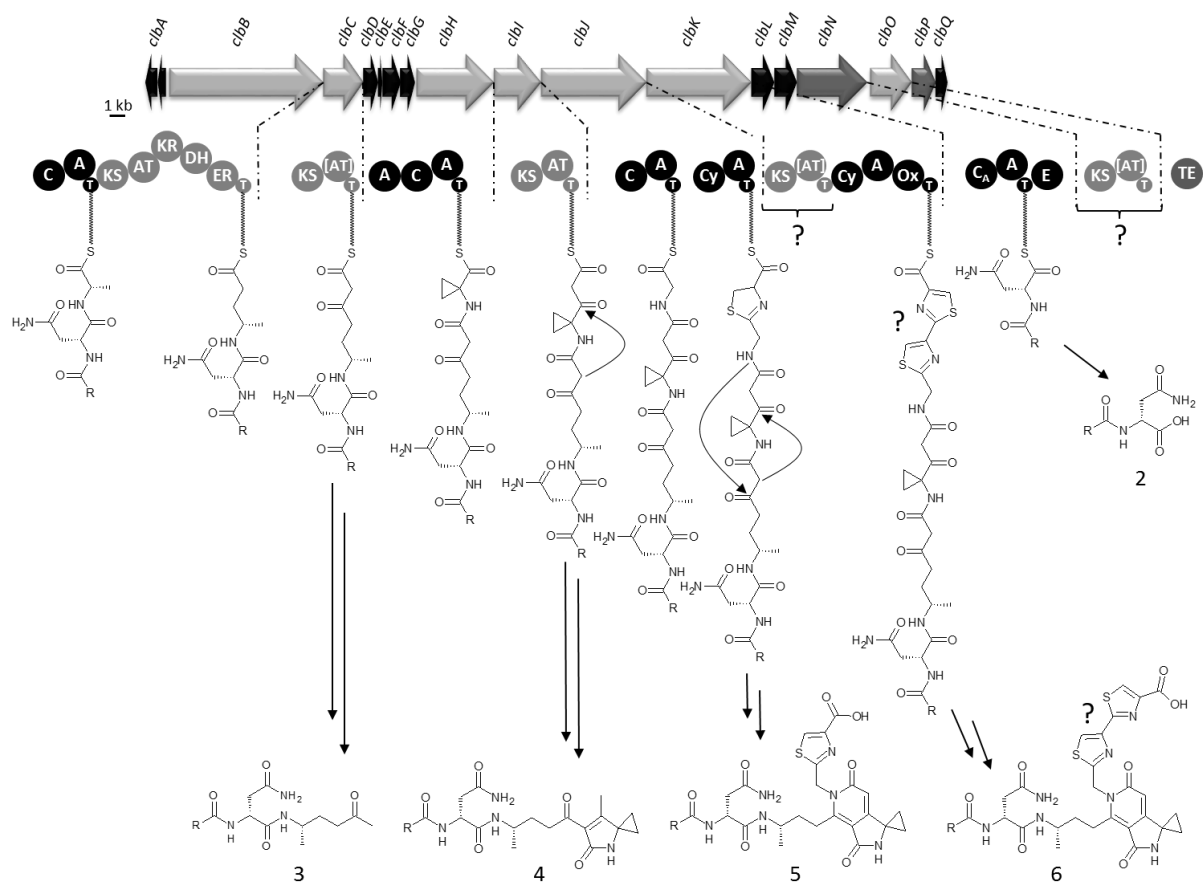

**Figure S1.** Architecture of the *clb* gene cluster from *E. coli* IHE2034 and model for colibactin biosynthesis based on previously available data. **6** is a hypothetical structure proposed on the basis of HRMS data.<sup>4</sup> NRPS modules are shown in black, PKS modules in grey. Numbered compounds were characterized in prior studies. Abbreviations: A, NRPS adenylation domain; AT, PKS acyltransferase; C, NRPS condensation domain; Cy, NRPS cyclization domain; DH, PKS dehydratase; E, NRPS epimerization domain; ER, PKS enoylreductase; KR, PKS ketoreductase; Ox, NRPS oxidation domain; T, PKS and NRPS thiolation domain (also referred to as ACP and PCP, respectively); TE, thioesterase domain. AT domains in parentheses are predicted to be inactive.

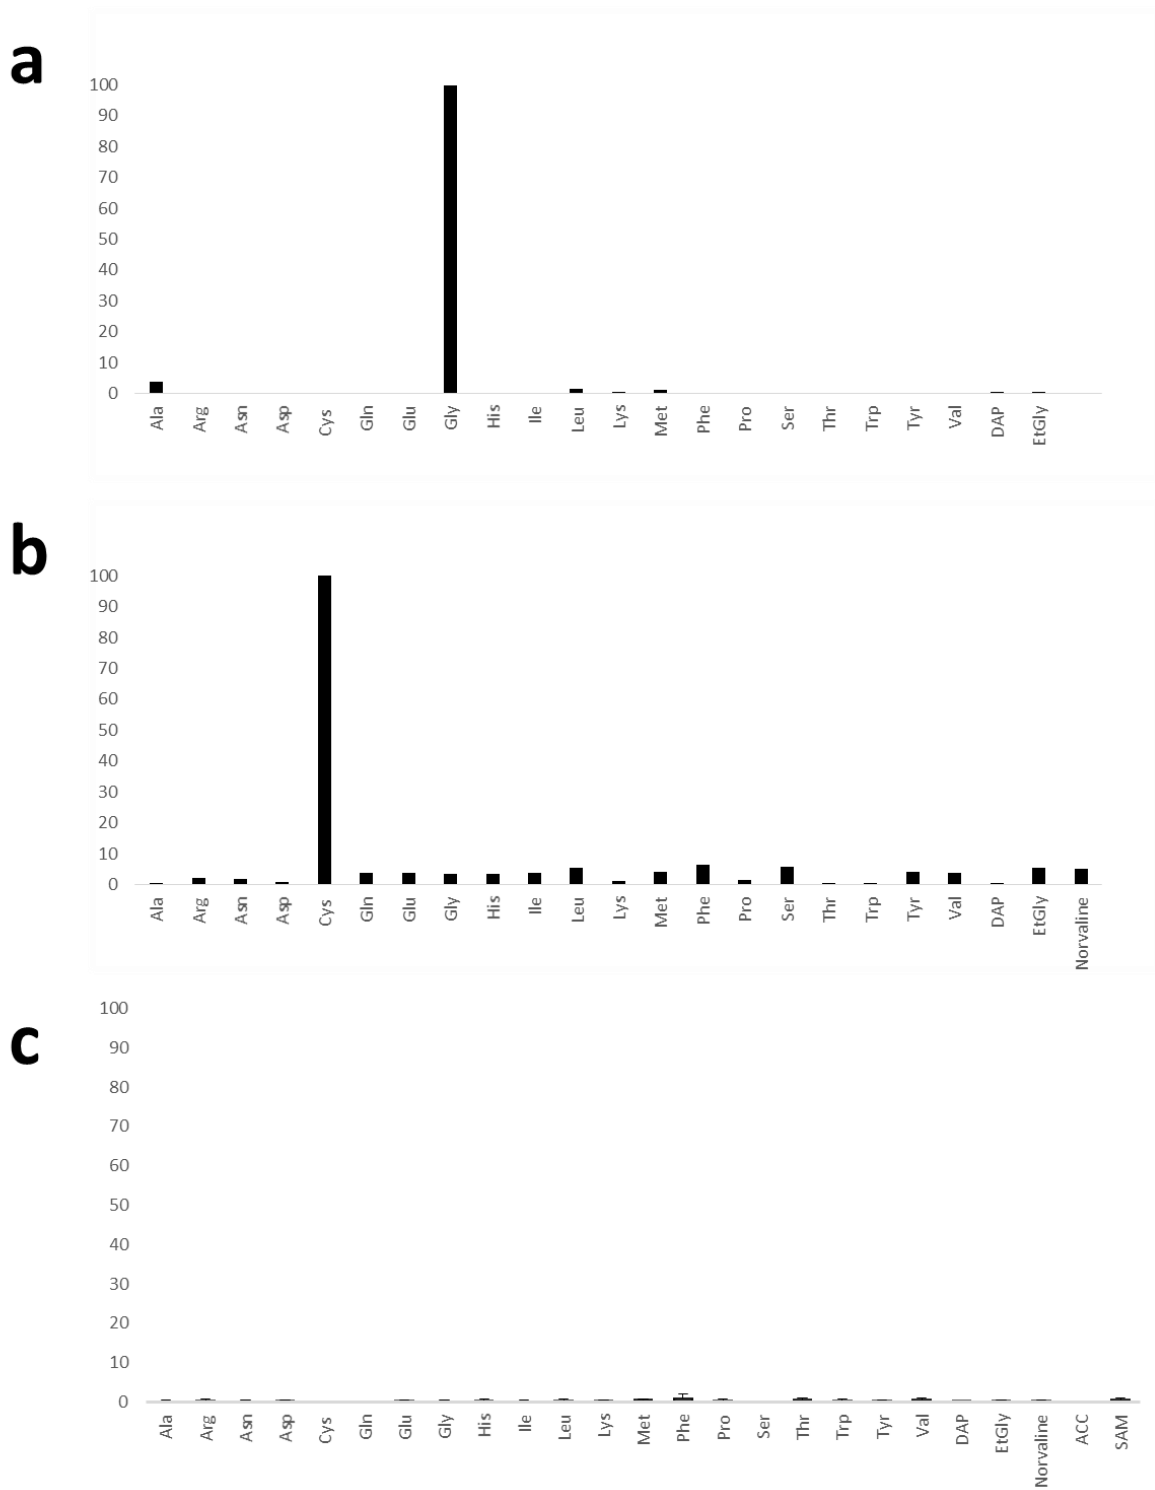

**Figure S2.** Exchange rates for the A domains ClbJ-A1 (a), ClbK-A2 (b) and ClbH-A2 (c) for various amino acid test substrates. EtGly, ethylglycine DAP, 2,3-diaminopropionic acid; ACC, aminocyclopropanecarboxylic acid; SAM, S-(5'-adenosyl)-L-methionine.

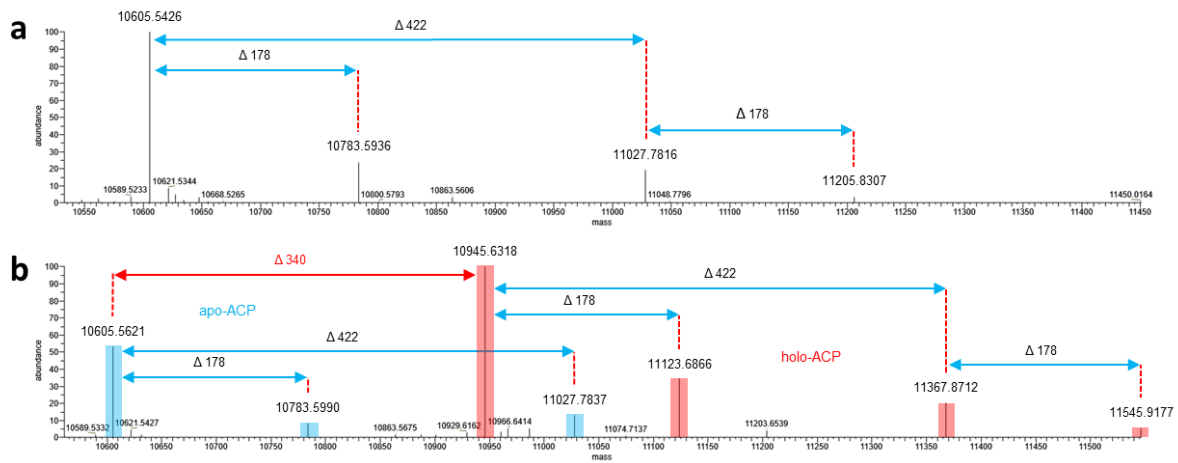

**Figure S3.** Activation of the ACP ClbE by the PPTase ClbA. (a) The deconvoluted spectrum shows ions for incubations containing the *apo*-ACP (calculated 10605.5524 Da) without PPTase. The mass shift of 178 Da corresponds to a modification of His-tagged proteins by gluconoylation, the 422 Da shift is as-yet unknown.<sup>5</sup> (b) Representative MS spectrum for assays containing the *apo*-ACP, PPTase ClbA, and coenzyme A. Ions of *apo*-ACP species are highlighted in blue, those of *holo*-ACP variants in red. The calculated mass of the *holo*-ACP is 10945.6382 Da. The covalent attachment of the phosphopantetheine moiety is indicated by a mass shift of 340 Da.

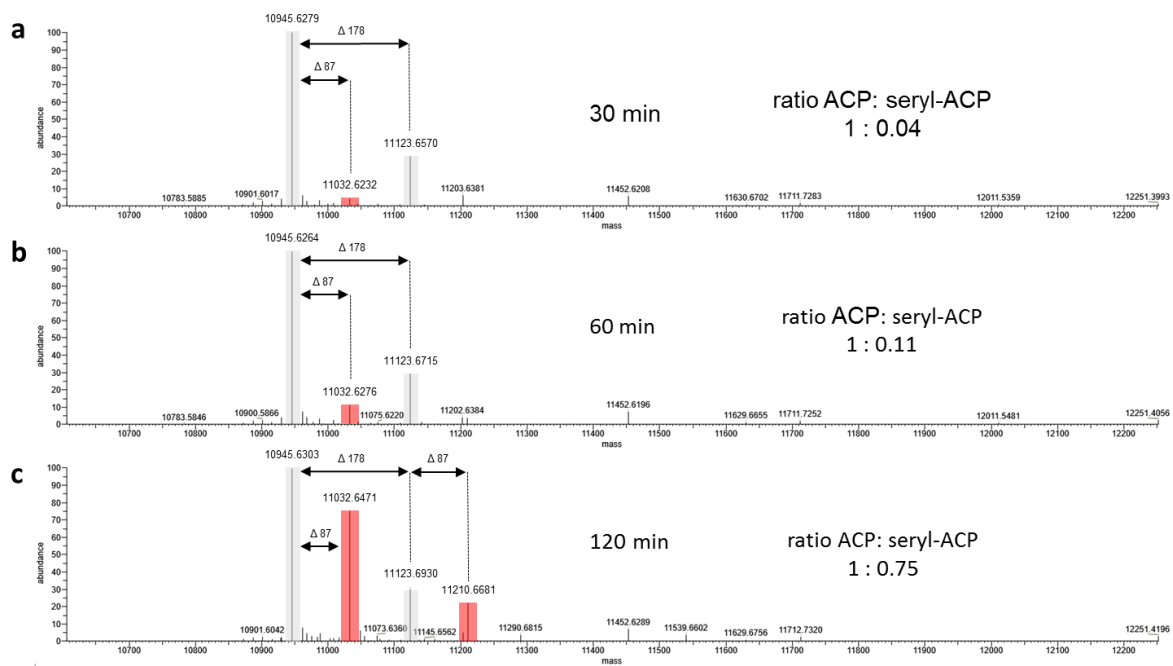

**Figure S4.** Deconvoluted spectra of ACP species formed in incubations of the *holo*-ACP ClbE with the A domain ClbH-A1 and serine. Formation of seryl-ACP over time was monitored. Ions corresponding to the *holo*-ACP (calculated 10945.6382 Da) are indicated by grey bars and those attributed to seryl-ACP (calculated 11032.6702 Da) are marked in red. The mass shift of +87 Da is consistent with loading of L-serine onto the *holo*-ACP. The mass shift of 178 Da corresponds to a glycosylated species.<sup>5</sup>



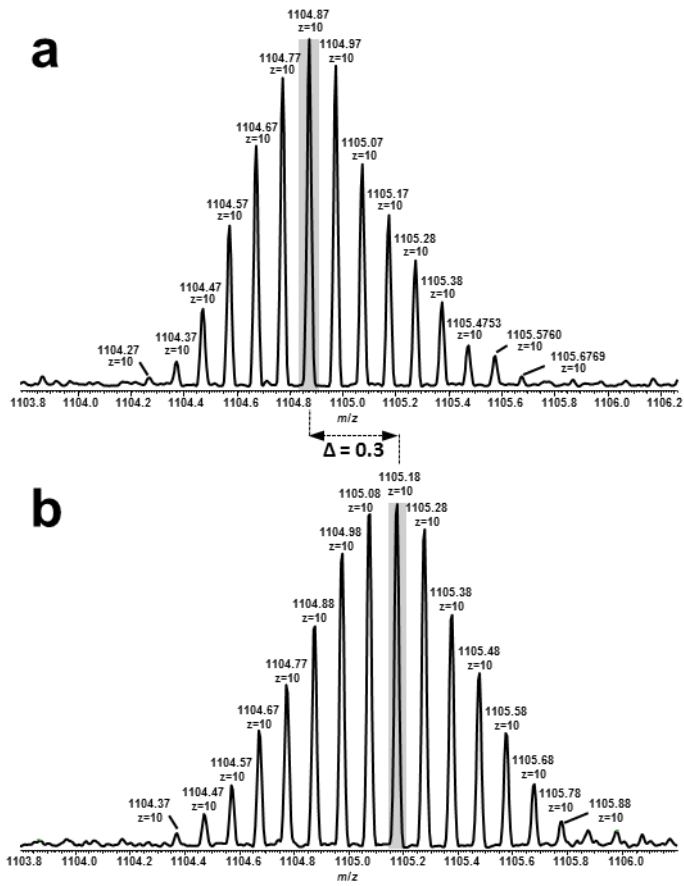

**Figure S5.** Isotopically resolved spectra of seryl-ACP  $[M+10H]^{10+}$  generated by incubation of *holo*-ClbE with ClbH-A1 and serine species. (a) Seryl-ACP using unlabelled L-serine as substrate. (b) Seryl-ACP using  $[^{13}C_3]$ -L-serine. The mass shift between the dominant ions corresponds to the incorporation of three  $^{13}C$  labels.

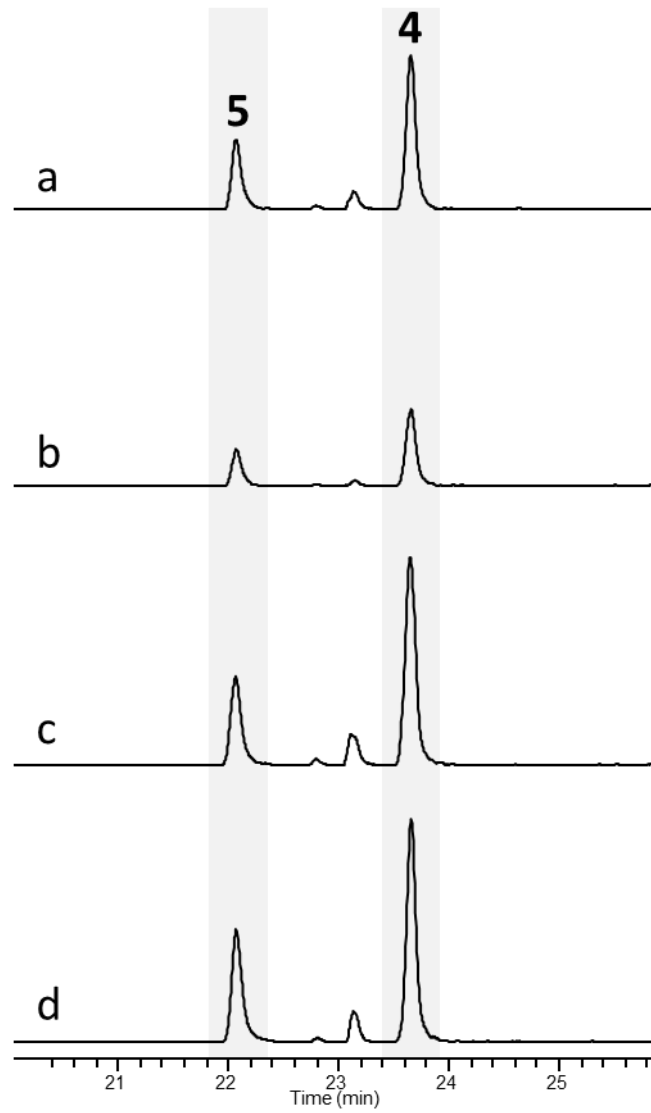

**Figure S6.** Extracted ion chromatograms of ACC-containing colibactin products **4** and **5**. The other two peaks belong to unknown compounds with ions of  $m/z = 547.3$  and  $713.3$ . (a) *E. coli* MG1655 pBAC $pks^+$   $\Delta clbE$  (b) *E. coli* MG1655 pBAC $pks^+$   $\Delta clbDEF$  (c) *E. coli* MG1655 pBAC $pks^+$   $\Delta clbE$  pTOPO $clbE$  (d) *E. coli* MG1655 pBAC $pks^+$   $\Delta clbE$  pTOPO $clbDEF$ .

```

ClbB_AT      -----MFPGQGSQYHGSMASALYAHQPMFRQHMDRCFAAFQR--YSTVDLKALL 46
ClbI_AT      -----MFSGQGSQYQRMGHQLYQVWPAYADAFDRCATLLER--EYQLDIRHEL 46
ClbG         -----MTKDVALMFPGSGSQYVGMARWLYERYPQVRTLFDEASQITERDMAALCLSGTL 54
ClbO_AT      -----TPAQAVQENERRLFFFSAKTPLALRQQLDAHYPALATYAEADKDRIAYTLAQ 52
ClbK_AT      -----STPQARAQQMGPCVVVLSAKNNHALEQMQNALLAKLAHPEIRLQDVAYTLRH 53
ClbC_AT      AVRDDHDQVRAPVFIPLSAPSFQEDELDTQLTPLLATLDASTLAYTQQVARVPDCRRV 60
                :
                :

ClbB_AT      FDDDEDTRD----IDQTQFTQPALFCVEYSLARTLIDLGITPDSMIGHS--LGEYVAACIA 100
ClbI_AT      FRAEVSLAQGERLAQTCLTQPLLFVVEYALAQWLWSWGITPTVMIGHS--LGEWVAATLA 104
ClbG         VQLAEPTA---MALAIYTTVAHFVAWQFLAQTVGHVNLRYMLGHS--LGEYAALTCS 108
ClbO_AT      RRAHFYPYRCALAADSVVALRASLAKLRDADMSFTPINMETTLVFLYFD--RDDKLESALT 110
ClbK_AT      GRFSAPVR-----KCVIAENCTQLARQLRDAPMVEATTGCTIYWRLGH--RFVVALETLS 106
ClbC_AT      IQVENDGTQAMLASLDNLMFPDAPWGLHCPDLRTTNDCTYAQWLAHSAHYQREATALTALL 120

ClbB_AT      GVFTLEDALHVIEAR-----GRLMQSMRPGSMMAVYLSREQLTPLWAAERG----- 146
ClbI_AT      GVFSLEDALRLVARR-----AELMHQAPSGAMLMVALPEAQIRALITAP----- 148
ClbG         GALSFSQALALVAMR-----SRLASEIAREMDASTTIIKQGNQALVAAACEVAERETRR 162
ClbO_AT      HLLACQPNLQRHQRLSQDV-AQICEPADWTPALRQFIQQVSLSEWLIEQ----- 159
ClbK_AT      DWLACSEVLSQAVGQLEHFPLEPAQLDLSPAQRFTISQYALIALIDERET----- 158
ClbC_AT      DGMNIPPAYCHAETWAAQANSLLIRGCQTIAALKTWMNLLPTLLTLLSGAGTG----- 173
                :
                :

ClbB_AT      -IELAANNSAHFCVAVAGEQAASIRLSTRLVEGG--IQHRLKTSHAFHS-AMMTPMLHDF 202
ClbI_AT      -LATAAVNAPDYSVIAGPTSEILAVSQRLTEQN--IINKRLHTSHAFHS-SMMQDAAQAL 204
ClbG         QVGIACFNSPQQFMLSGQNSAIIAAEQYLLDHRQVEVVPLIGGVPHYH-PLLKPCGQQL 221
ClbO_AT      --SISPVQHIGYLTGAAAAQYVARIISLENAVQQVIVAETTPPEQTLAGN-SELSEILANL 216
ClbK_AT      -LNVVLCGDDGGYAAAVLRGDCLEQAWHRLNAGQPFDDVPTNPLLQP-DVCSLMLDDA 216
ClbC_AT      --LLPAAAASGMIAATQDVLHLLWEMEQQKALHLWLPERHEPIPGYVLAWQGNPITDAQRND 231
                :
                :

ClbB_AT      AQLLQGQIPMHAPHKRFISNVSGTWITTEEQATSPDYVWVQVRNAVLFSEGAQQLLVQPTL- 261
ClbI_AT      RQAFENVRLNPPTLTIISTVTGAHVADTLTTPDYWIEQMLMPVQFSAALQEAQATFDVD 264
ClbG         RKALDRCEWRRPCCPVISNVN-AQYPDVTVPVQWLEQQLSQPVQWRSLTYLTGHLSP 280
ClbO_AT      AVTEGTLMLEIGRAGTFSLYHQHAQWVGQTVFSPMLNTDTPEDILPLLGLTWQRGV TIC 276
ClbK_AT      ASDANRTALEALGQLWLAGVSLDWRVWVDAERMLGSQRIALPGTVFTPQRVWVEAVRPAT 276
ClbC_AT      RGFWSEALLADTRELGEVHVSINWVRLPPEIREDDVVLRYVAQLWCAGINVDWAVVYGT 291

ClbB_AT      FIECGPGNTLS-----TFIQGHN-----QYSDQPTLLTLRKA----- 293
ClbI_AT      FLEIGPGATLT-----QLTNGH-----ALGDRLAFSSLPAG----- 295
ClbG         AIEIGPQSVLKNLLENRYPAVYAFDNRHDRAQLALVLGDNMAVKTDPEAVRRQRITLL 340
ClbO_AT      LPEMPAVQTIG-----LPGYSFDRVRYEIQSSDARENAMLVPSYLSV----- 318
ClbK_AT      FSHESSNNLS-----RATKSDI----- 294
ClbC_AT      LPQRGSASAYP-----FAHNHYPLPGRVMGSVETQPEAGPETHHPYQARPV 337

ClbB_AT      -----
ClbI_AT      -----
ClbG         TNALTATRRHHRAADVAASAQLKELLSRFFERIQQIEQRGTSSEEDIAFLHELLEQGFQLK 400
ClbO_AT      -----
ClbK_AT      -----
ClbC_AT      LSVPFVAAHSRG----- 349

ClbB_AT      -----
ClbI_AT      -----
ClbG         GSSQAEIDACHARLASDNGGQA 422
ClbO_AT      -----
ClbK_AT      -----
ClbC_AT      -----
                :
                :

```

**Figure S7.** ClustalW analysis of AT domains of ClbB, ClbC, ClbI, ClbK and ClbO (Fig. S1). The highly conserved GHSxG motif of ATs is highlighted in blue. The HAFH motif correlated to malonyl-CoA-specific ATs is highlighted in green.

**Table S1.** Comparison of accessory proteins in the colibactin and zwittermicin cluster.

| <i>E. coli</i> IHE 3034 |               |           |                                 | <i>Bacillus cereus</i> UW85 <sup>a</sup> |         |           |               |
|-------------------------|---------------|-----------|---------------------------------|------------------------------------------|---------|-----------|---------------|
| Protein                 | Accession No. | Size (aa) | Deduced function                | Identity/<br>similarity                  | Protein | Size (aa) | Accession No. |
| ClbA                    | CAJ76300.1    | 244       | phosphopantetheinyl transferase | -- <sup>b</sup>                          | --      | --        | --            |
| ClbD                    | CAJ76296.1    | 289       | 3-hydroxyacyl-CoA dehydrogenase | 44 / 66                                  | ZmaG    | 282       | AAR87756.1    |
| ClbE                    | CAJ76295.1    | 82        | acyl-carrier protein            | 31 / 60                                  | ZmaH    | 81        | AAR87757.1    |
| ClbF                    | CAJ76294.1    | 376       | acyl-CoA dehydrogenase          | 34 / 56                                  | ZmaE    | 382       | AAD40109.1    |
| ClbH                    | CAJ76292.1    | (1598)    | NRPS A1-domain                  | 36 / 58                                  | ZmaI    | 397       | AAR87758.1    |
| (A1)                    |               |           |                                 | 43 / 59                                  | ZmaJ    | 525       | AAR87759.1    |
| ClbG                    | CAJ76293.1    | 422       | malonyl-CoA transacylase        | 34 / 54                                  | ZmaF    | 405       | AAD40110.1    |

<sup>a</sup>*Bacillus cereus* strain UW85 zwittermicin A biosynthetic gene cluster, GenBank accession number: FJ430564.1

<sup>b</sup>There is no homolog for ClbA in the zwittermicin cluster

**Table S2.** Identified MS ions corresponding to ACP species in coincubations of ClbA, ClbE, ClbH-A1, ClbD, ClbF, coenzyme A, serine, NAD<sup>+</sup> and FAD (Fig. 2e).

| <b>ACP species</b> | <b>molecular formula</b>                                                             | <b>calculated<br/>mass</b> | <b>detected<br/>mass<sup>a</sup></b> | <b>mass error<br/>(ppm)</b> | <b>relative<br/>abundance</b> |
|--------------------|--------------------------------------------------------------------------------------|----------------------------|--------------------------------------|-----------------------------|-------------------------------|
| apo-ClbE           | C <sub>470</sub> H <sub>752</sub> N <sub>136</sub> O <sub>142</sub> S                | 10605.5524                 | 10605.5356                           | 1.58                        | 25.59                         |
| holo-ClbE          | C <sub>481</sub> H <sub>773</sub> N <sub>138</sub> O <sub>148</sub> S <sub>2</sub> P | 10945.6382                 | 10945.6281                           | 0.92                        | 100                           |
| seryl-ClbE         | C <sub>484</sub> H <sub>778</sub> N <sub>139</sub> O <sub>150</sub> S <sub>2</sub> P | 11032.6702                 | 11032.6423                           | 2.53                        | 20.96                         |
| glycyl-ClbE        | C <sub>483</sub> H <sub>776</sub> N <sub>139</sub> O <sub>149</sub> S <sub>2</sub> P | 11002.6675                 | 11002.6307                           | 3.34                        | 64.48                         |

<sup>a</sup>spectra deconvoluted with Thermo Protein Deconvolution Software 2.0

**Table S3.** Plasmids used in this study.

| Plasmid                      | Characteristics                                                                 | Source / Reference       |
|------------------------------|---------------------------------------------------------------------------------|--------------------------|
| pCOLADuet <sup>TM</sup> -1   | Expression vector, IPTG inducible T7 promoter, Km <sup>R</sup>                  | Novagen <sup>®</sup>     |
| pCR-XL-TOPO <sup>®</sup>     | Expression vector, IPTG inducible T7 promoter, Km <sup>R</sup>                  | Invitrogen <sup>TM</sup> |
| pBAC <i>pks</i> <sup>+</sup> | colibactin cluster from <i>E. coli</i> IHE3034, Cm <sup>R</sup>                 | Ref. 5                   |
| pCOLAclbA                    | pCOLADuet <sup>TM</sup> -1, <i>clbA</i> with N-terminal His-tag in MCS1         | This work                |
| pCOLAclbD                    | pCOLADuet <sup>TM</sup> -1, <i>clbD</i> with N-terminal His-tag in MCS1         | This work                |
| pCOLAclbE                    | pCOLADuet <sup>TM</sup> -1, <i>clbE</i> with N-terminal His-tag in MCS1         | This work                |
| pCOLAclbF                    | pCOLADuet <sup>TM</sup> -1, <i>clbF</i> with N-terminal His-tag in MCS1         | This work                |
| pCOLAclbH(A1)                | pCOLADuet <sup>TM</sup> -1, <i>clbH(A1)</i> with N-terminal His-tag in MCS1     | This work                |
| pCOLAclbH(A2)                | pCOLADuet <sup>TM</sup> -1, <i>clbH(A2)</i> with N-terminal His-tag in MCS1     | This work                |
| pCOLAclbJ-A1(PCP)            | pCOLADuet <sup>TM</sup> -1, <i>clbJ(A1)</i> PCP with N-terminal His-tag in MCS1 | This work                |
| pCOLAclbK-A2(PCP)            | pCOLADuet <sup>TM</sup> -1, <i>clbK(A2)</i> PCP with N-terminal His-tag in MCS1 | This work                |
| pCOLAclbJ-A1                 | pCOLADuet <sup>TM</sup> -1, <i>clbJ(A1)</i> with N-terminal His-tag in MCS1     | This work                |
| pCOLAclbK-A2                 | pCOLADuet <sup>TM</sup> -1, <i>clbK(A2)</i> with N-terminal His-tag in MCS1     | This work                |
| pTOPOclbDEF                  | pCR-XL-TOPO <sup>®</sup> , <i>clbDEF</i> operon                                 | This work                |
| pTOPOclbE                    | pCR-XL-TOPO <sup>®</sup> , <i>clbE</i>                                          | This work                |

**Table S4.** Oligonucleotides used in this study.

| Oligonucleotide   | 5' to 3' Sequence                                                    |
|-------------------|----------------------------------------------------------------------|
| GB_clbD_Rv        | gcgccgagctcgaattcgggtaaccagaatcactgctcg                              |
| GB_clbD_Fw        | catcatcaccacagccagaacgtggcggtaataggtgca                              |
| GB_clbE_Rv        | gcgccgagctcgaattcgttactccaggcctgtttgtc                               |
| GB_clbE_Fw        | catcatcaccacagccagaaaaagcaagatatgaaagcc                              |
| GB_clbF_Rv        | gcgccgagctcgaattcggacatccttcgtcatgcttc                               |
| GB_clbF_Fw        | catcatcaccacagccagtgactgaaaattatgagctg                               |
| GB_clbG_Rv        | catatgtagaaaataatattacacagatttc                                      |
| GB_clbG_Fw        | gagctccatttgattacaatactgtgatgttc                                     |
| GB_clbA_Rv        | catatgaaaaatgcagtgcaaatgtgaatga                                      |
| GB_clbA_Fw        | ctgcagaccaagttatcttcttcttactgaatctt                                  |
| GIB_A2_Ser_Rv     | catatgaaagatagcatggctaaaaaggaaat                                     |
| GIB_A2_Ser_Fw     | gagctcagtaagtcaggattaaaactcttctccgc                                  |
| GIB_A2_unknown_Fw | catcaccacagccagatc gatggcgcatcacc                                    |
| GIB_A2_unknown_Rv | ccgagctcgaattcgttacagacgctgtccagttcg                                 |
| GIB_A4_Gly_Fw     | catcatcaccacagccaggacatgacagtcgaggtgttcc                             |
| GIB_A4_Gly_Rv     | gcgccgagctcgaattcgttatgctgtgcaatacgcgcactc                           |
| GIB_A6_Cys2_Fw    | catcatcaccacagccagtacagtatttcacagacaccgc                             |
| GIB_A6_Cys2_Rv    | gcgccgagctcgaattcgattgtgcagttgctcatcaagg                             |
| Awo_PCP_Fw        | taacgaattcgaagctcggcgc                                               |
| A6wo_PCP_Rv       | atagctcggcggttgatg                                                   |
| A4wo_PCP_Rv       | ttccgtgctgctcagcgc                                                   |
| ColGap_Fw         | catgatcgtgcgcaactagc                                                 |
| ColGap_Rv         | aggcaccaccagctttaca                                                  |
| ColGap2_Fw        | gtatctcgctggatcgggc                                                  |
| ColGap2_Rv        | atcatcactcaccgagggga                                                 |
| CG-clbE-P1        | actgcctcttgctgagccagctcataatctcagtcacatagttactcgtgtaggctggagctgcttc  |
| CG-clbE-P2        | agacgtacgccgagcagtgattctgggtaaccagataggatgaatacatatgaatcctccttag     |
| CG-clbDEF-P1      | attgcgaaccggagccaggaacatcagtcgacatccttcgtcatgcttgtgtaggctggagctgcttc |

CG-clbDEF-P2            actggggggcgaagacaacctcgaatatagcctgtcagtaaaggagctcaacatatgaatatcctccttag  
CG\_clbDEF\_Fw            gaaccggagccagggaac  
CG\_clbDEF\_Rv            aatccgcgcaatatctacgc

1. K. A. Datsenko and B. L. Wanner, *Proc. Natl. Acad. Sci. U. S. A.*, 2000, **97**, 6640-6645.
2. V. V. Phelan, Y. Du, J. A. McLean and B. O. Bachmann, *Chem. Biol.*, 2009, **16**, 473-478.
3. P. Martin, I. Marcq, G. Magistro, M. Penary, C. Garcie, D. Payros, M. Boury, M. Olier, J. P. Nougayrede, M. Audebert, C. Chalut, S. Schubert and E. Oswald, *PLoS Path.*, 2013, **9**, e1003437.
4. Z. R. Li, Y. Li, J. Y. Lai, J. Tang, B. Wang, L. Lu, G. Zhu, X. Wu, Y. Xu and P. Y. Qian, *ChemBioChem*, 2015, online early version, doi: 10.1002/cbic.201500239.
5. K. F. Geoghegan, H. B. Dixon, P. J. Rosner, L. R. Hoth, A. J. Lanzetti, K. A. Borzilleri, E. S. Marr, L. H. Pezzullo, L. B. Martin, P. K. LeMotte, A. S. McColl, A. V. Kamath and J. G. Stroh, *Anal. Biochem.*, 1999, **267**, 169-184.
